# Supplementary material for: Safety and immunogenicity of the third booster dose with inactivated, viral vector, and mRNA COVID-19 vaccines in fully immunized healthy adults with inactivated vaccine
Source: bioRxiv or medRxiv preprint supplement (doi:10.1101/2021.12.03.21267281), 2021-12-05
Supplement: Supplementary file [file media-1.pdf]

Supplementary information

Supplementary Figure and Tables

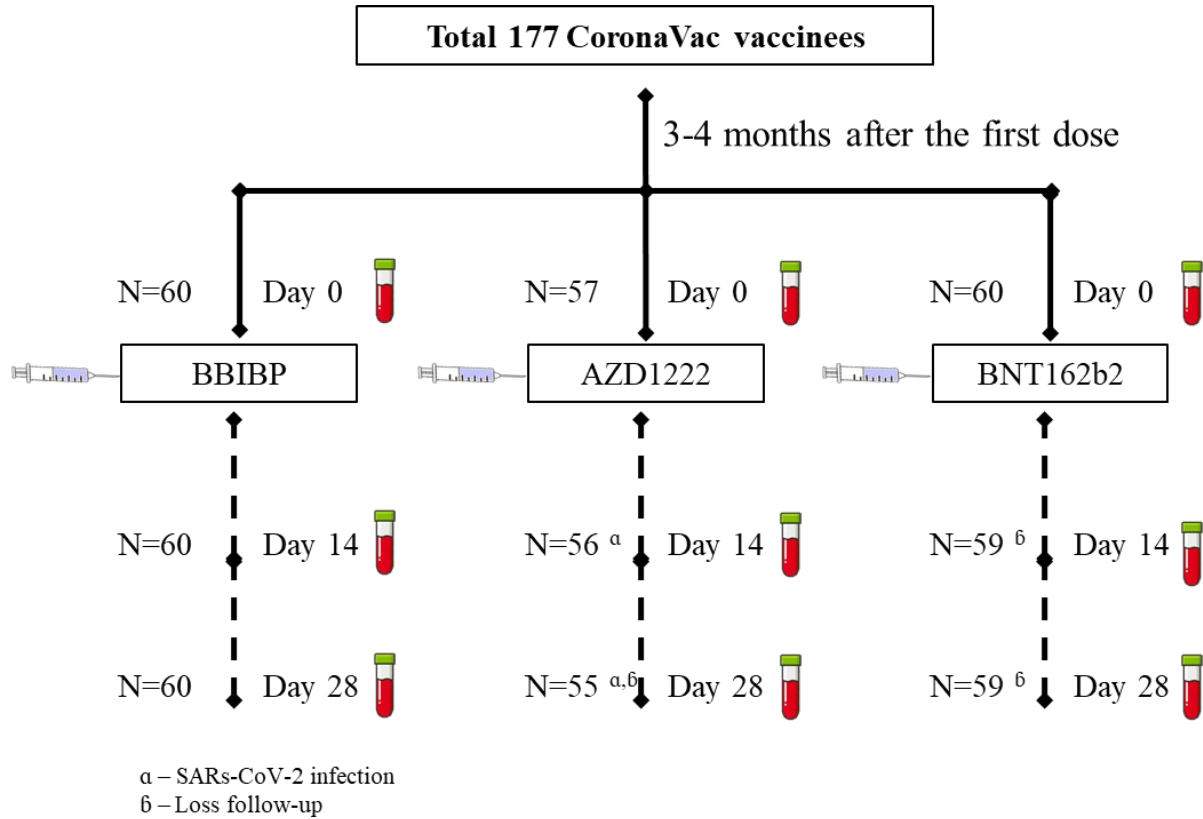

**Supplementary Figure S1.** The participant flow diagram of this clinical study of third booster and blood sampling collection.

|                            | <b>BBIBP</b>   | <b>AZD1222</b> | <b>p value</b> | <b>Result</b> | <b>BBIBP</b>   | <b>BNT162b2</b> | <b>p value</b> | <b>Result</b> | <b>AZD1222</b> | <b>BNT162b2</b> | <b>p value</b> | <b>Result</b> |
|----------------------------|----------------|----------------|----------------|---------------|----------------|-----------------|----------------|---------------|----------------|-----------------|----------------|---------------|
| <b>n</b>                   |                |                |                |               |                |                 |                |               |                |                 |                |               |
| <b>Total (%)</b>           | 60<br>(100.00) | 57<br>(100.00) |                |               | 60<br>(100.00) | 60<br>(100.00)  |                |               | 57<br>(100.00) | 60<br>(100.00)  |                |               |
| <b>Injection site pain</b> | 33<br>(55.00)  | 52 (91.23)     | <<br>0.0001    | Yes           | 33<br>(55.00)  | 59 (98.33)      | <<br>0.0001    | Yes           | 52 (91.23)     | 59 (98.33)      | 0.1079         | No            |
| <b>Swelling</b>            | 6 (10.00)      | 25 (43.86)     | <<br>0.0001    | Yes           | 6 (10.00)      | 25 (41.67)      | 0.0001         | Yes           | 25 (43.86)     | 25 (41.67)      | 0.8531         | No            |
| <b>Redness</b>             | 4 (6.67)       | 18 (31.58)     | 0.0007         | Yes           | 4 (6.67)       | 21 (35.00)      | 0.0002         | Yes           | 18 (31.58)     | 21 (35.00)      | 0.8446         | No            |
| <b>Fever</b>               | 0 (0.00)       | 9 (15.79)      | <<br>0.0001    | Yes           | 0 (0.00)       | 5 (8.33)        | 0.0573         | No            | 9 (15.79)      | 5 (8.33)        | 0.2615         | No            |
| <b>Headache</b>            | 10<br>(16.67)  | 41 (71.93)     | <<br>0.0001    | Yes           | 10<br>(16.67)  | 34 (56.67)      | <<br>0.0001    | Yes           | 41 (71.93)     | 34 (56.67)      | 0.1226         | No            |
| <b>Myalgia</b>             | 19<br>(31.67)  | 44 (77.19)     | <<br>0.0001    | Yes           | 19<br>(31.67)  | 44 (73.33)      | <<br>0.0001    | Yes           | 44 (77.19)     | 44 (73.33)      | 0.6729         | No            |
| <b>Nausea</b>              | 2 (3.33)       | 10 (17.54)     | 0.0142         | Yes           | 2 (3.33)       | 11 (18.33)      | 0.0159         | Yes           | 10 (17.54)     | 11 (18.33)      | >0.9999        | No            |
| <b>Vomiting</b>            | 0 (0.00)       | 3 (5.26)       | 0.1125         | No            | 0 (0.00)       | 5 (8.33)        | 0.0573         | No            | 3 (5.26)       | 5 (8.33)        | 0.7175         | No            |
| <b>Diarrhea</b>            | 5 (8.33)       | 16 (28.07)     | 0.0074         | Yes           | 5 (8.33)       | 10 (16.67)      | 0.2693         | No            | 16 (28.07)     | 10 (16.67)      | 0.1825         | No            |
| <b>Joint pain</b>          | 3 (5.00)       | 23 (40.35)     | <<br>0.0001    | Yes           | 3 (5.00)       | 13 (21.67)      | 0.0136         | Yes           | 23 (40.35)     | 13 (21.67)      | 0.0443         | Yes           |

|                  |           |            |             |     |           |            |             |     |            |            |         |    |
|------------------|-----------|------------|-------------|-----|-----------|------------|-------------|-----|------------|------------|---------|----|
| <b>Chilling</b>  | 5 (8.33)  | 32 (56.14) | <<br>0.0001 | Yes | 5 (8.33)  | 27 (45.00) | <<br>0.0001 | Yes | 32 (56.14) | 27 (45.00) | 0.2690  | No |
| <b>Dizziness</b> | 7 (11.67) | 21 (36.84) | 0.0021      | Yes | 7 (11.67) | 23 (38.33) | 0.0013      | Yes | 21 (36.84) | 23 (38.33) | >0.9999 | No |

**Supplementary Table S1** Statistic analysis of reactogenicity data of between the booster vaccines.

The Fisher's Exact Test was used to interpret the statistical analysis.

**Supplementary Table S2.** The data values from laboratory testing of participants who received the booster dose with BBIBP, AZD1222 or BNT162b2, which referred to graphic info displays.

|                                | <b>BBIBP</b>          | <b>AZD1222</b>         | <b>BNT162b2</b>          |
|--------------------------------|-----------------------|------------------------|--------------------------|
| <b>Humoral responses</b>       |                       |                        |                          |
| <b>Ig anti-RBD (U/mL)</b>      |                       |                        |                          |
| Day 0 (baseline), n            | 60                    | 57                     | 60                       |
| GMT (95% CI)                   | 35.45 (25.8 - 48.71)  | 37.89 (27.39 - 52.41)  | 48.57 (36.54 - 64.58)    |
| Day 14, n                      | 60                    | 56                     | 59                       |
| GMT (95% CI)                   | 1,073 (849.4 - 1,355) | 9,865 (7,990 - 12,182) | 20,787 (18,229 - 23,703) |
| Day 28, n                      | 60                    | 55                     | 59                       |
| GMT (95% CI)                   | 839.9 (674.1 - 1,047) | 8,160 (6,635-10,035)   | 13,871 (11,993 - 16,043) |
| <b>IgG anti-RBD (BAU/mL)</b>   |                       |                        |                          |
| Day 0 (baseline), n            | 60                    | 57                     | 60                       |
| GMT (95% CI)                   | 42.76 (33.78 - 54.12) | 41.13 (33.22 - 50.93)  | 48.99 (40.77 - 58.88)    |
| Day 14, n                      | 60                    | 56                     | 59                       |
| GMT (95% CI)                   | 205.5 (167.0 - 253.0) | 1,936 (1,597 - 2,346)  | 3,821 (3,306 - 4,416)    |
| Day 28, n                      | 60                    | 55                     | 59                       |
| GMT (95% CI)                   | 164.1 (133.8 - 201.1) | 1,736 (1,434 - 2,101)  | 2,584 (2,250 - 2,966)    |
| <b>IgG anti-N index (S/C)</b>  |                       |                        |                          |
| Day 0 (baseline), n            | 60                    | 57                     | 60                       |
| Median (IQR)                   | 0.265 (0.140 - 1.130) | 0.230 (0.095 - 0.810)  | 0.535 (0.170 - 1.078)    |
| Day 14, n                      | 60                    | 56                     | 59                       |
| Median (IQR)                   | 2.970 (1.715 - 4.745) | 0.205 (0.083 - 0.615)  | 0.51 (0.180 - 0.880)     |
| Day 28, n                      | 60                    | 55                     | 59                       |
| Median (IQR)                   | 2.780 (1.513 - 4.643) | 0.170 (0.070 - 0.400)  | 0.51 (0.230 - 0.880)     |
| <b>IgA anti-S1 ratio (S/C)</b> |                       |                        |                          |
| Day 0 (baseline), n            | 20                    | 20                     | 20                       |
| Median (IQR)                   | 0.685 (0.453 - 0.845) | 0.455 (0.255 - 0.628)  | 0.675 (0.453 - 0.845)    |
| Day 14, n                      | 60                    | 56                     | 59                       |
| Median (IQR)                   | 2.055 (1.073 - 4.383) | 8.515 (5.23 - 9.00)    | 9.00 (9.00 - 9.00)       |
| Day 28, n                      | 60                    | 55                     | 59                       |

|                                 |                        |                          |                        |
|---------------------------------|------------------------|--------------------------|------------------------|
| Median (IQR)                    | 1.300 (0.565 - 2.955)  | 7.450 (4.09 – 9.00)      | 9.00 (7.12– 9.00)      |
| <b>Neutralization assay</b>     |                        |                          |                        |
| <b>sVNT-WT (%inhibition)</b>    |                        |                          |                        |
| Day 0 (baseline), n             | 10                     | 10                       | 10                     |
| Median (IQR)                    | 20.9 (18.33 - 36.95)   | 35.15 (19.23 - 46.45)    | 40.25 (20.48 - 45.93)  |
| Day 14, n                       | N/D                    | N/D                      | N/D                    |
| Median (IQR)                    |                        |                          |                        |
| Day 28, n                       | 30                     | 30                       | 30                     |
| Median (IQR)                    | 79.75 (62.33 - 89.93)  | 97.60 (97.20 - 97.80)    | 97.80 (97.68 - 97.90)  |
| <b>Neutralization assay</b>     |                        |                          |                        |
| <b>sVNT-Alpha (%inhibition)</b> |                        |                          |                        |
| Day 0 (baseline), n             | 10                     | 10                       | 10                     |
| Median (IQR)                    | 9.25 (4.50 - 18.53)    | 17.30 (17.30 - 26.08)    | 19.45 (12.15 - 25.03)  |
| Day 14, n                       | N/D                    | N/D                      | N/D                    |
| Median (IQR)                    |                        |                          |                        |
| Day 28, n                       | 30                     | 30                       | 30                     |
| Median (IQR)                    | 67.20 (51.10 - 81.80)  | 96.50 (94.58 - 97.33)    | 97.05 (97.05 - 97.53)  |
| <b>Neutralization assay</b>     |                        |                          |                        |
| <b>sVNT-Beta (%inhibition)</b>  |                        |                          |                        |
| Day 0 (baseline), n             | 10                     | 10                       | 10                     |
| Median (IQR)                    | -3.80 ((-8.28) - 2.50) | -0.15 ((-19.93) - 10.68) | 1.15 ((-10.95) - 7.50) |
| Day 14, n                       | N/D                    | N/D                      | N/D                    |
| Median (IQR)                    |                        |                          |                        |
| Day 28, n                       | 30                     | 30                       | 30                     |
| Median (IQR)                    | 50.55 (36.35 - 67.18)  | 91.85 (87.80 - 93.98)    | 93.30 (90.65 - 94.90)  |
| <b>Neutralization assay</b>     |                        |                          |                        |
| <b>sVNT-Delta (%inhibition)</b> |                        |                          |                        |
| Day 0 (baseline), n             | 10                     | 10                       | 10                     |
| Median (IQR)                    | 24.40 (17.98 - 30.13)  | 30.95 (20.70 - 42.65)    | 27.40 (20.15 - 40.43)  |
| Day 14, n                       | N/D                    | N/D                      | N/D                    |
| Median (IQR)                    |                        |                          |                        |

|                                                                        |                       |                       |                       |
|------------------------------------------------------------------------|-----------------------|-----------------------|-----------------------|
| Day 28, n                                                              | 30                    | 30                    | 30                    |
| Median (IQR)                                                           | 72.00 (53.75 - 86.93) | 97.35 (96.45 - 97.73) | 97.60 (97.18 - 97.80) |
| <b>T-cell responses</b>                                                |                       |                       |                       |
| <b>IFN-<math>\gamma</math> CD4<sup>+</sup> (IU/mL)</b>                 |                       |                       |                       |
| Day 0 (baseline), n                                                    | 60                    | 57                    | 60                    |
| Median (IQR)                                                           | 0.050 (0.020 - 0.140) | 0.030 (0.000 - 0.145) | 0.035 (0.000 - 0.128) |
| Day 14, n                                                              | 60                    | 56                    | 58*                   |
| Median (IQR)                                                           | 0.125 (0.053 - 0.453) | 0.500 (0.188 - 1.173) | 1.250 (0.430 - 3.698) |
| Day 28, n                                                              | 60                    | 55                    | 59                    |
| Median (IQR)                                                           | 0.085 (0.030 - 0.238) | 0.260 (0.090 - 0.710) | 0.790 (0.290 - 1.890) |
| <b>IFN-<math>\gamma</math> CD4<sup>+</sup> CD8<sup>+</sup> (IU/mL)</b> |                       |                       |                       |
| Day 0 (baseline), n                                                    | 60                    | 57                    | 60                    |
| Median (IQR)                                                           | 0.075 (0.030 - 0.258) | 0.040 (0.010 - 0.210) | 0.050 (0.010 - 0.208) |
| Day 14, n                                                              | 60                    | 56                    | 58*                   |
| Median (IQR)                                                           | 0.240 (0.060 - 0.615) | 0.720 (0.325 - 1.690) | 2.020 (0.538 - 4.993) |
| Day 28, n                                                              | 60                    | 55                    | 59                    |
| Median (IQR)                                                           | 0.155 (0.053 - 0.410) | 0.470 (0.170 - 1.430) | 1.260 (0.400 - 3.090) |

N/D – do not determine.

\* – one participant's sample is not adequate to evaluate QFN assay because we were unable to obtain the appropriate amount of heparinized blood.
